# Supplementary material for: Association between MDR1 polymorphisms and XELIRI and XELOX chemoresistance in Saudi patients with colorectal cancer
Source: PubMed Central journal article supplement — Oncol Lett. 2020 Aug 24;20(5):155. doi: 10.3892/ol.2020.12016 (PMC7471754; doi:10.3892/ol.2020.12016), 2020-08-24

Figure S1. Representative agarose gel electrophoresis for *MDR1* G2677T. The PCR products were treated with *Xba*I endonuclease. The wild genotype (GG) has one band, at 107 bp (lane 1), heterozygous genotype (GT) has three bands (lanes 5 and 6), at 107, 83 and 24 bp, whilst homozygous genotype (TT) has two bands (lanes 2-4), at 83 and 24 bp. The PCR product sizes were compared to the 100 bp DNA ladder (lane 7). *MDR1*, multidrug resistance member 1.

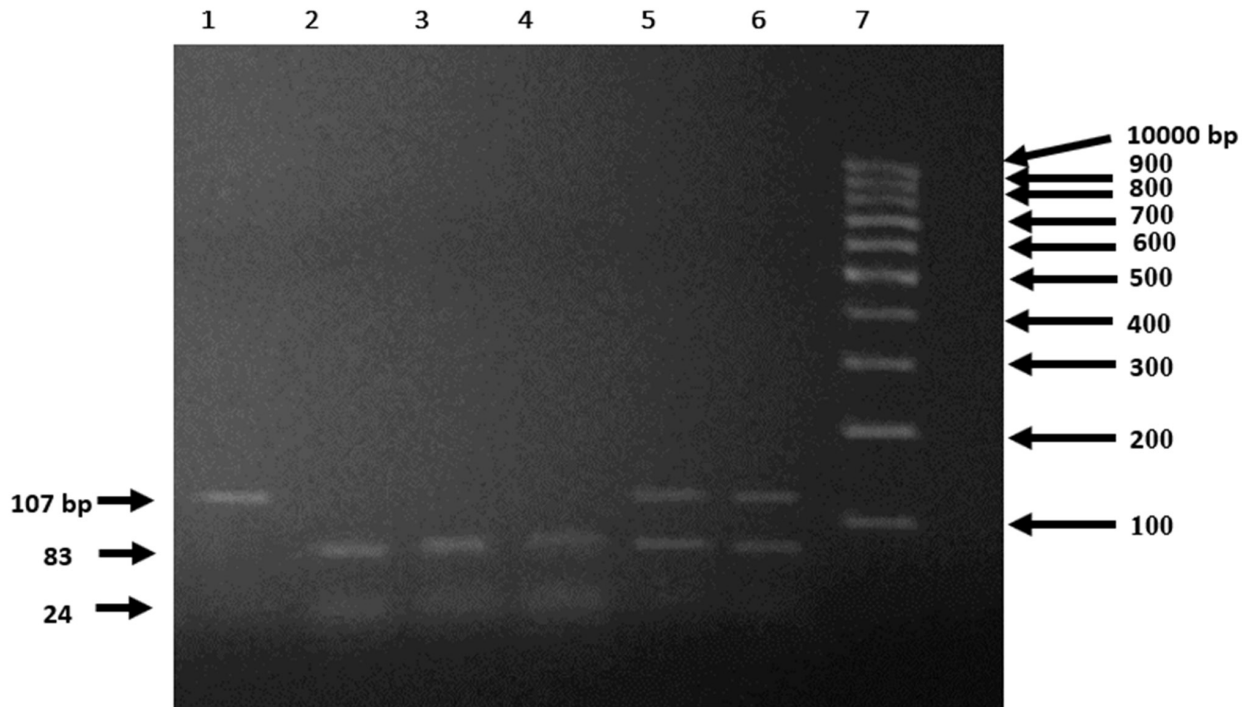

Supplement: Supplementary_Data.pdf [file Supplementary_Data.pdf]
